# Supplementary material for: Comprehensive Characterization of the Coding and Non-Coding Single Nucleotide Polymorphisms in the Tumor Protein p63 (TP63) Gene Using In Silico Tools
Source: MDPI journal article supplement (doi:10.3390/biom11111733), 2021-11-20
Supplement: s1 [file s1]

# Supplementary Tables and Figures

---

## Comprehensive Characterization of the Coding and Non-coding Single Nucleotide Polymorphisms in the Tumor Protein p63 (TP63) Gene Using In Silico Tools

Akter. Shamima<sup>1</sup>, Hossain. Shafaat<sup>2</sup>, Ali. Md Ackas <sup>3</sup>, Hosen. Md. Ismail<sup>2</sup>, Shekhar. Hossain Uddin<sup>2\*</sup>

1. Department of Bioinformatics and Computational Biology, George Mason University, Fairfax, Virginia- 22030, USA
2. Clinical Biochemistry and Translational Medicine Laboratory, Department of Biochemistry and Molecular Biology, University of Dhaka, Dhaka-1000, Bangladesh.
3. Division of Computer Aided Drug-Design, The Red-Green Research Center, 16, Tejkunipara, Tejgaon, Dhaka-1215, Bangladesh

\* Correspondence to: Email: [hossainshekhar@du.ac.bd](mailto:hossainshekhar@du.ac.bd)

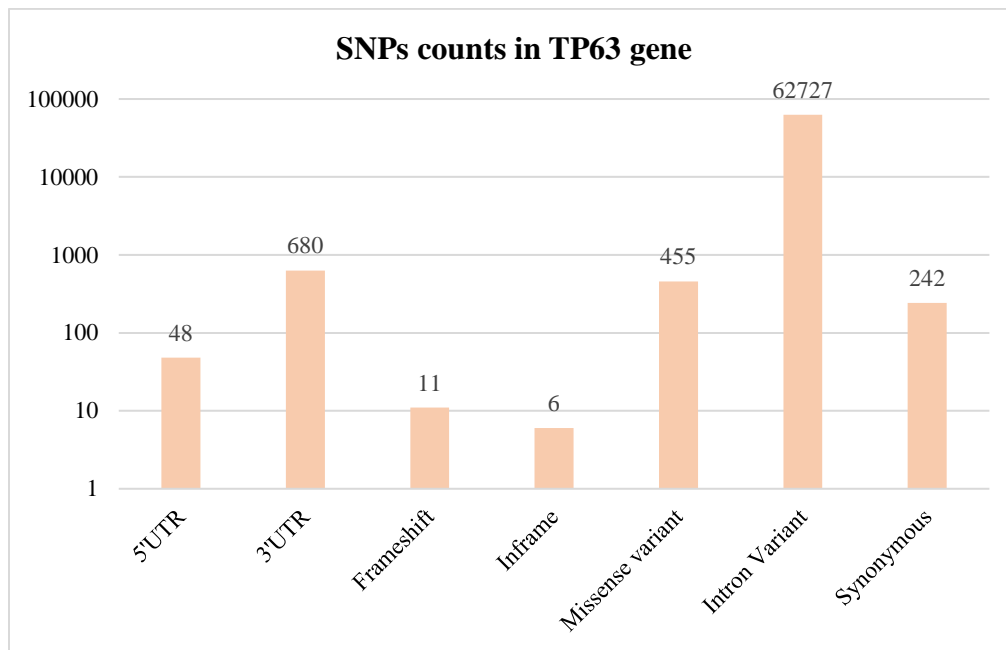

Figure S1. SNP types and number of TP63

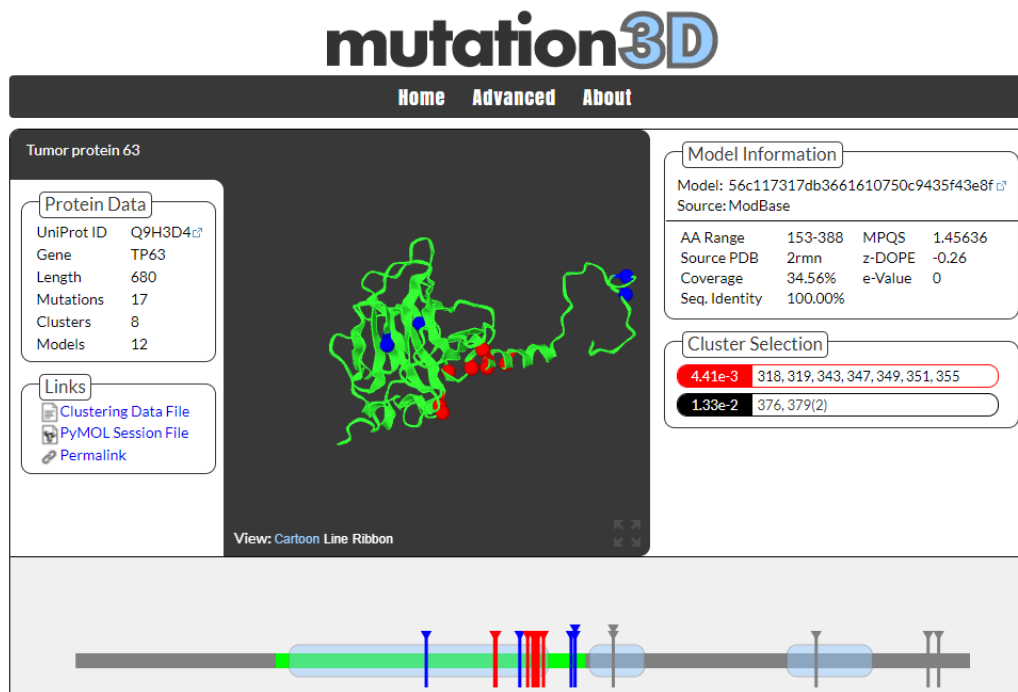

Figure S2. Mutations in protein structure. The positions of the SNPs are R266Q, R318H, R319H, R343Q, R337Q, C347F, D355N, G349E, R376C, R408C, R408H, R376C, R379C, R379H, L562R, R647H, R655Q. (This figure has been downloaded from Mutation 3D website after analysis; Mutation3D <http://mutation3d.org>)

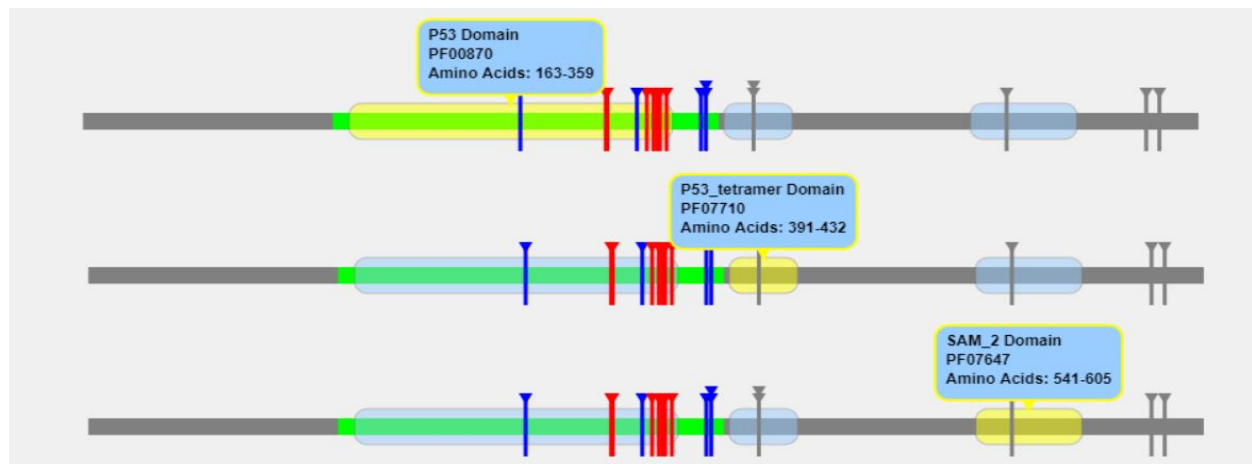

Figure S3. Three domains are shown in yellow color with blue box labeling after structural analysis with Mutation 3D. Vertical sticks show the mutation in different domains. P53 domain is the DNA binding domain of TP63. R266Q, R318H, R319H, R337Q, R343Q, C347F, D351G, G349E, D355N, are present in p53 domain or DNA binding domain, R376C, R408C, R408H, R379C, R379H are in p53\_tetramer domain and L562R in Sam domain.

A wild type R319

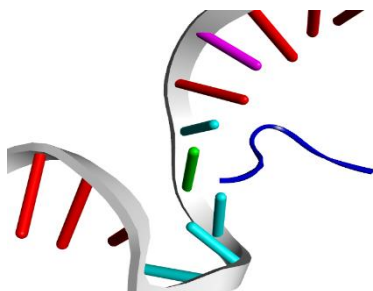

B wild type R319

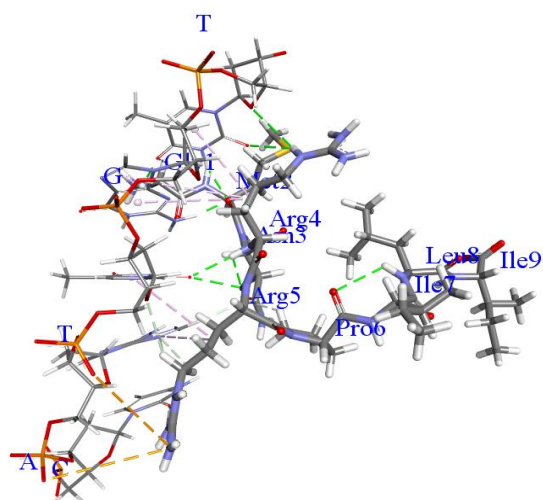

C Mutant H319

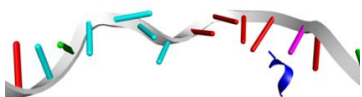

D Mutant H319

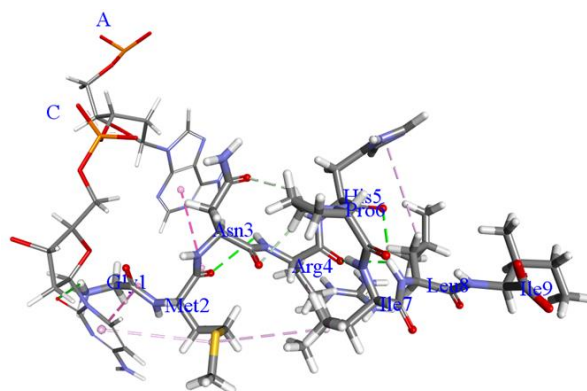

E Wild type G349

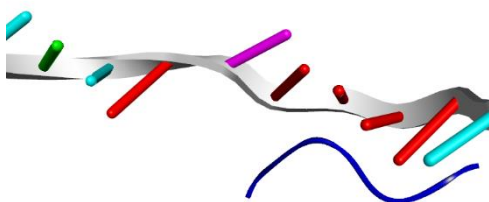

F wild type G349

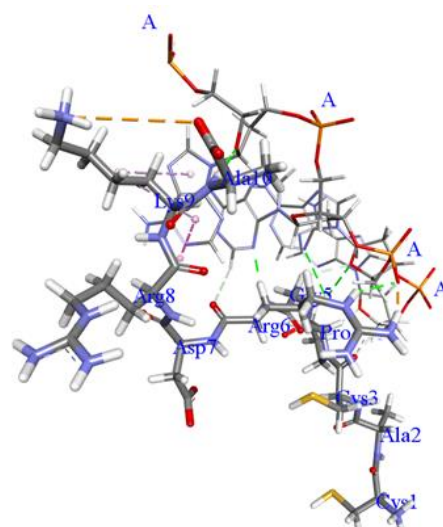



Page 5 of 14

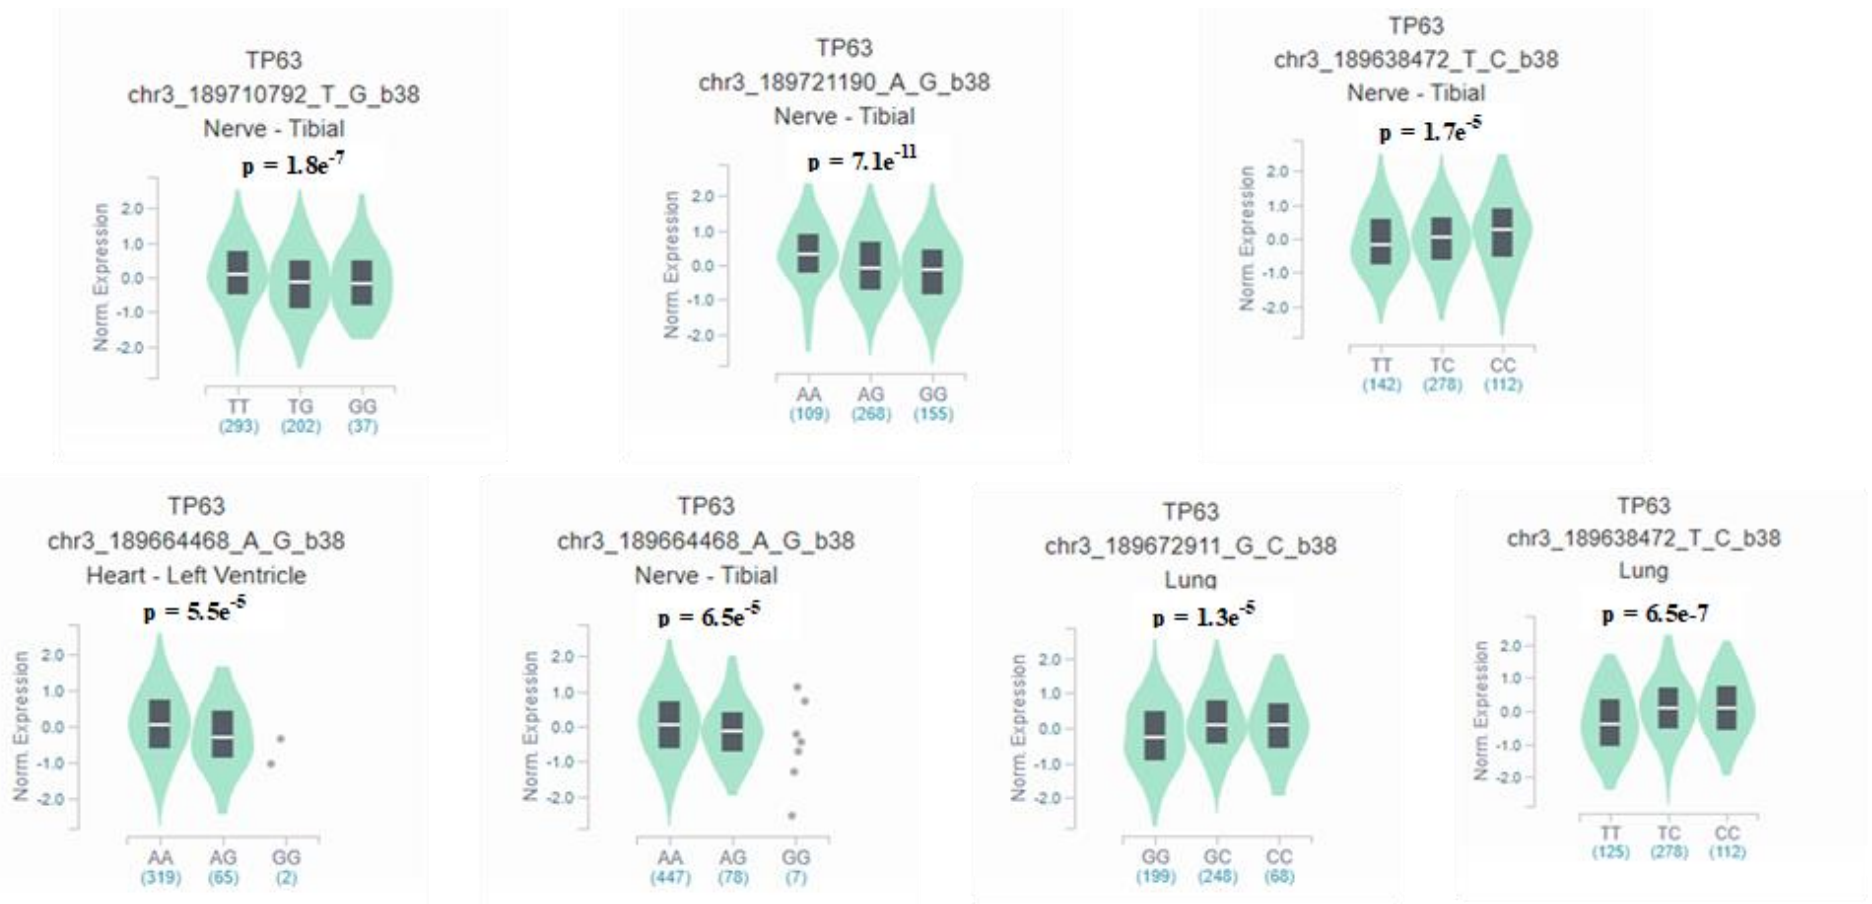

Figure S5. Violin plots of noncoding SNPs for single tissue eQTLs through analyzing with GTEx portal. The plots show the normalized TP63 gene expressions with mutations in different tissues along with significant p values.

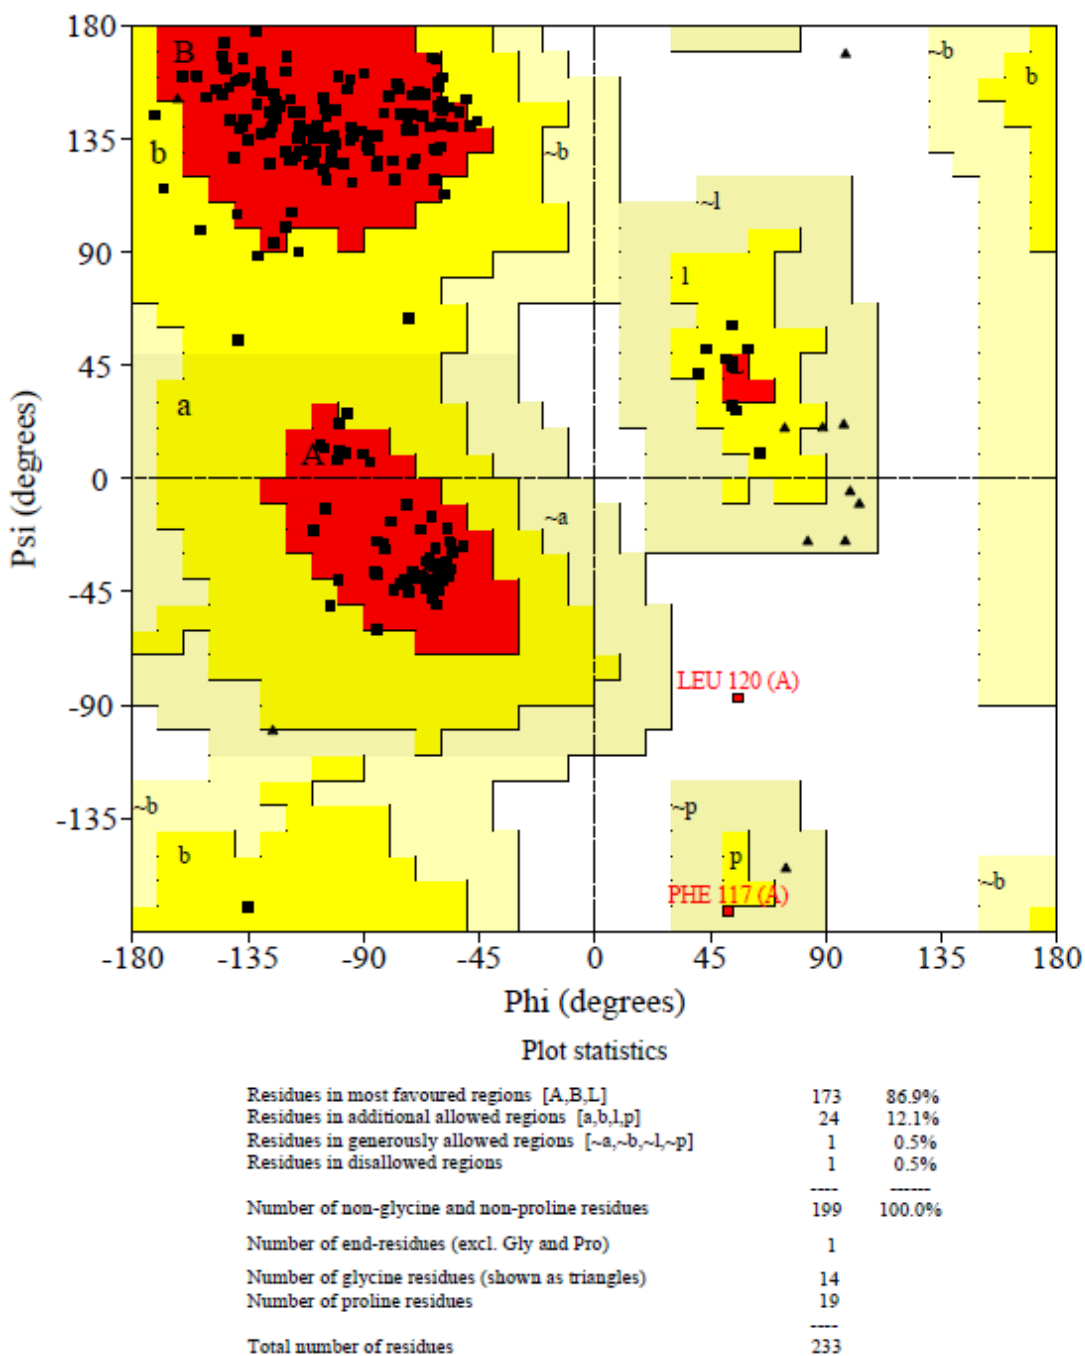

Figure S6: Ramachandran plot statistics of Precheck analysis in PDB sum server for 3D structure of TP63 protein: 2RMN.A,B,L denote the alpha, beta, and loop structures in protein.

**Table S1. Functional nsSNPs Prediction in TP63 in SIFT, PolyPhen2, CADD**

| Variant ID   | SNP   | Source | Conseq.Type<br>(SNP type) | SIFT_class  | PolyPhen2 class   | CADD_class         |
|--------------|-------|--------|---------------------------|-------------|-------------------|--------------------|
| rs1266601767 | D178Y | dbSNP  | missense variant          | deleterious | probably damaging | likely deleterious |
| rs866938979  | S189L | dbSNP  | missense variant          | deleterious | probably damaging | likely deleterious |
| rs1057517984 | Y202C | dbSNP  | missense variant          | deleterious | probably damaging | likely deleterious |
| rs121908849  | R266Q | dbSNP  | missense variant          | deleterious | probably damaging | likely deleterious |
| rs121908840  | R318H | dbSNP  | missense variant          | deleterious | probably damaging | likely deleterious |
| rs886039442  | R319H | dbSNP  | missense variant          | deleterious | probably damaging | likely deleterious |
| rs1320920860 | V325D | dbSNP  | missense variant          | deleterious | probably damaging | likely deleterious |
| rs753404887  | D331V | dbSNP  | missense variant          | deleterious | probably damaging | likely deleterious |
| rs1040062725 | G332R | dbSNP  | missense variant          | deleterious | probably damaging | likely deleterious |
| rs113993967  | R337Q | dbSNP  | missense variant          | deleterious | probably damaging | likely deleterious |
| rs1029852196 | R338H | dbSNP  | missense variant          | deleterious | probably damaging | likely deleterious |
| rs121908841  | R343Q | dbSNP  | missense variant          | deleterious | probably damaging | likely deleterious |
| rs1064793282 | C347F | dbSNP  | missense variant          | deleterious | probably damaging | likely deleterious |
| rs866267914  | G349E | dbSNP  | missense variant          | deleterious | probably damaging | likely deleterious |
| rs121908844  | D351G | dbSNP  | missense variant          | deleterious | probably damaging | likely deleterious |
| rs1553857889 | D355N | dbSNP  | missense variant          | deleterious | probably damaging | likely deleterious |
| rs757536818  | R376C | dbSNP  | missense variant          | deleterious | probably damaging | likely deleterious |
| rs761885185  | R379C | dbSNP  | missense variant          | deleterious | probably damaging | likely deleterious |
| rs765502786  | R379H | dbSNP  | missense variant          | deleterious | probably damaging | likely deleterious |
| rs1173679499 | R393Q | dbSNP  | missense variant          | deleterious | probably damaging | likely deleterious |
| rs1282887680 | R408C | dbSNP  | missense variant          | deleterious | probably damaging | likely deleterious |
| rs751698974  | R408H | dbSNP  | missense variant          | deleterious | probably damaging | likely deleterious |
| rs886039443  | F552C | dbSNP  | missense variant          | deleterious | probably damaging | likely deleterious |
| rs121908843  | C561G | dbSNP  | missense variant          | deleterious | probably damaging | likely deleterious |
| rs774221257  | L562R | dbSNP  | missense variant          | deleterious | probably damaging | likely deleterious |
| rs1172845743 | Y574C | dbSNP  | missense variant          | deleterious | probably damaging | likely deleterious |
| rs774550896  | R647H | dbSNP  | missense variant          | deleterious | probably damaging | likely deleterious |
| rs764601563  | R655Q | dbSNP  | missense variant          | deleterious | probably damaging | likely deleterious |



**Table S2. Analysis of nsSNPs using PROVEAN and ClinVar**

| <b>Variant ID</b> | <b>SNP</b> | <b>Source</b> | <b>PROVEAN score</b> | <b>PROVEAN impact</b> | <b>ClinVar result</b>  |
|-------------------|------------|---------------|----------------------|-----------------------|------------------------|
| rs1266601767      | D178Y      | dbSNP         | -3.381               | Deleterious           | not found              |
| rs866938979       | S189L      | dbSNP         | -5.556               | Deleterious           | not found              |
| rs1057517984      | Y202C      | dbSNP         | -7.964               | Deleterious           | Likely pathogenic      |
| rs121908849       | R266Q      | dbSNP         | -3.612               | Deleterious           | Pathogenic             |
| rs121908840       | R318H      | dbSNP         | -4.645               | Deleterious           | Pathogenic             |
| rs886039442       | R319H      | dbSNP         | -4.627               | Deleterious           | Pathogenic             |
| rs1320920860      | V325D      | dbSNP         | -4.628               | Deleterious           | not found              |
| rs753404887       | D331V      | dbSNP         | -6.694               | Deleterious           | not found              |
| rs1040062725      | G332R      | dbSNP         | -5.704               | Deleterious           | not found              |
| rs113993967       | R337Q      | dbSNP         | -3.618               | Deleterious           | Pathogenic             |
| rs1029852196      | R338H      | dbSNP         | -4.523               | Deleterious           | Uncertain significance |
| rs121908841       | R343Q      | dbSNP         | -3.663               | Deleterious           | Pathogenic             |
| rs1064793282      | C347F      | dbSNP         | -10.073              | Deleterious           | Pathogenic             |
| rs866267914       | G349E      | dbSNP         | -7.342               | Deleterious           | Pathogenic             |
| rs121908844       | D351G      | dbSNP         | -6.41                | Deleterious           | Pathogenic             |
| rs1553857889      | D355N      | dbSNP         | -3.512               | Deleterious           | Pathogenic             |
| rs757536818       | R376C      | dbSNP         | -3.65                | Deleterious           | not found              |
| rs761885185       | R379C      | dbSNP         | -2.648               | Deleterious           | Uncertain significance |
| rs765502786       | R379H      | dbSNP         | -1.476               | Neutral               | Uncertain significance |
| rs1173679499      | R393Q      | dbSNP         | -2.402               | Neutral               | not found              |
| rs1282887680      | R408C      | dbSNP         | -7.064               | Deleterious           | not found              |
| rs751698974       | R408H      | dbSNP         | -4.461               | Deleterious           | not found              |
| rs886039443       | F552C      | dbSNP         | -2.7                 | Deleterious           | Likely pathogenic      |
| rs121908843       | C561G      | dbSNP         | -3.819               | Deleterious           | Likely pathogenic      |
| rs774221257       | L562R      | dbSNP         | -2.328               | Neutral               | not found              |
| rs1172845743      | Y574C      | dbSNP         | -2.828               | Deleterious           | not found              |
| rs774550896       | R647H      | dbSNP         | -2.062               | Neutral               | not found              |
| rs764601563       | R655Q      | dbSNP         | -1.246               | Neutral               | not found              |

**Table S3. Regulome DB results of non-coding SNPs**

| dbSNP IDs             | Regulome DB Rank | Regulome DB Score | Type                | Position in respect to TP63 |
|-----------------------|------------------|-------------------|---------------------|-----------------------------|
| rs62290004            | 2a               | 0.67948           | Intron Variant      | Intron 1-2                  |
| rs6774934             | 2a               | 1                 | Intron Variant      | Intron 1-2                  |
| rs11708278            | 2b               | 0.68277           | Intron Variant      | Intron 3-4                  |
| rs1913721             | 2b               | 0.43292           | Intron Variant      | Intron 4-5                  |
| rs1913722, rs57898901 | 2b               | 0.62301           | Intron Variant      | Intron 4-5                  |
| rs4488809             | 2b               | 0.57802           | Intron Variant      | Intron 1-2                  |
| rs4687090             | 2b               | 0.43292           | Intron Variant      | Intron 1-2                  |
| rs55803942            | 2b               | 0.46415           | Intron Variant      | Intron 3-4                  |
| rs56104635            | 2b               | 0.70883           | Intron Variant      | Intron 4-5                  |
| rs6444404             | 2b               | 0.50526           | Intron Variant      | Intron 4-5                  |
| rs6794898             | 2b               | 0.67017           | Intron Variant      | Intron 1-2                  |
| rs6797174             | 2b               | 0.93104           | Intron Variant      | Intron 1-2                  |
| rs79155799            | 2b               | 0.55744           | Intron Variant      | Intron 1-2                  |
| rs79659066            | 2b               | 0.69579           | Intron Variant      | Intron 3-4                  |
| rs9830137             | 2b               | 0.70883           | Intron Variant      | Intron 3-4                  |
| rs9847745             | 2b               | 0.63796           | Intron Variant      | Intron 1-2                  |
| rs10049472            | 2c               | 0.49417           | Intron Variant      | Intron 1-2                  |
| rs4687085             | 2c               | 0.42417           | Intron Variant      | Intron 1-2                  |
| rs6777728             | 2c               | 0.9               | Intron Variant      | Intron 4-5                  |
| rs28673064            | 3a               | 0.97433           | 5 prime UTR variant | 5 prime UTR                 |
| rs78233713            | 7                | 0.18412           | 3 prime UTR variant | 3 prime UTR                 |
| rs73199799            | 7                | 0.18412           | 3 prime UTR variant | 3 prime UTR                 |

**Table S4. miRNA binding site prediction of noncoding SNPs in TP63 protein through PolymiRTS**

| Location  | dbSNP ID    | Variant | Wobble | Ancestral | Allele | miR ID                           | Conservation | miR Site           | Function | Exp | context+ |
|-----------|-------------|---------|--------|-----------|--------|----------------------------------|--------------|--------------------|----------|-----|----------|
| 189612062 | rs142981128 | SNP     | Y      | G         | G      | <a href="#">hsa-miR-22-3p</a>    | <u>16</u>    | accaccGGCAGC<br>T  | D        | N   | -0.161   |
|           |             |         |        |           |        | <a href="#">hsa-miR-138-5p</a>   | <u>14</u>    | acCACCAGCAg<br>ct  | C        | N   | -0.35    |
|           |             |         |        |           |        | <a href="#">hsa-miR-3692-5p</a>  | <u>14</u>    | accaCCAGCAGc<br>t  | C        | N   | -0.186   |
|           |             |         |        |           |        | <a href="#">hsa-miR-4456</a>     | <u>13</u>    | aCCACCAGcagc<br>t  | C        | N   | -0.192   |
|           |             |         |        |           |        | <a href="#">hsa-miR-4722-5p</a>  | <u>14</u>    | tctcatCTCCTGC      | O        | N   | -0.168   |
| 189612196 | rs140149400 | SNP     | Y      | A         | A      | <a href="#">hsa-miR-1273f</a>    | <u>19</u>    | cagaCCATCTCtt      | D        | N   | -0.149   |
|           |             |         |        |           |        | <a href="#">hsa-miR-4527</a>     | <u>19</u>    | CAGACCAAtctctt     | D        | N   | -0.131   |
|           |             |         |        |           |        | <a href="#">hsa-miR-6503-5p</a>  | <u>19</u>    | CAGACCAAtctctt     | D        | N   | -0.131   |
|           |             |         |        |           |        | <a href="#">hsa-miR-6753-3p</a>  | <u>19</u>    | CAGACCAAtctctt     | D        | N   | -0.119   |
|           |             |         |        |           |        | <a href="#">hsa-miR-7107-3p</a>  | <u>19</u>    | CAGACCAAtctctt     | D        | N   | -0.116   |
| 189613717 | rs36099321  | SNP     | N      | C         | G      | <a href="#">hsa-miR-409-5p</a>   | <u>12</u>    | catatcGGTAACC      | C        | N   | -0.073   |
|           |             |         |        |           | C      | <a href="#">hsa-miR-184</a>      | <u>10</u>    | gtttcCCGTCCAAt     | D        | N   | -0.135   |
|           |             |         |        |           |        | <a href="#">hsa-miR-4804-5p</a>  | <u>10</u>    | gtttcCCGTCCAAt     | D        | N   | -0.122   |
|           |             |         |        |           |        | <a href="#">hsa-miR-4520a-3p</a> | <u>10</u>    | gtttcCTGTCCAAt     | C        | N   | -0.011   |
|           |             |         |        |           | C      | <a href="#">hsa-miR-636</a>      | <u>13</u>    | tggttaaCAAGCA<br>C | C        | N   | -0.166   |
| 189614414 | rs36064124  | SNP     | N      | C         | C      | <a href="#">hsa-miR-6892-5p</a>  | <u>13</u>    | ctgctTCCCTTAc      | D        | N   | -0.119   |
| 189614507 | rs35861864  | SNP     | Y      | G         | G      | <a href="#">hsa-miR-101-3p</a>   | <u>10</u>    | tGTACTGTgtctc      | D        | N   | -0.086   |

**Table S5. PolymiRTS Results of noncoding SNPs for disease association**

| Disease/Trait                            | PubMedID | MarkerID   | <i>p</i> _Value     |
|------------------------------------------|----------|------------|---------------------|
| Brain imaging                            | 20100581 | rs7610017  | NS                  |
| Lung cancer                              | 23143601 | rs4488809  | 4x10 <sup>-9</sup>  |
| Lung cancer                              | 21725308 | rs4488809  | 7x10 <sup>-26</sup> |
| Lung adenocarcinoma                      | 22797724 | rs10937405 | 7x10 <sup>-17</sup> |
| Lung adenocarcinoma                      | 20871597 | rs10937405 | 7x10 <sup>-12</sup> |
| Acute lymphoblastic leukemia (childhood) | 22076464 | rs17505102 | 9x10 <sup>-9</sup>  |
| Acute lymphoblastic leukemia (childhood) | 22076464 | rs17505102 | 2x10 <sup>-8</sup>  |
| Bladder cancer                           | 20972438 | rs710521   | 2x10 <sup>-10</sup> |
| Urinary bladder cancer                   | 20348956 | rs710521   | 6x10 <sup>-8</sup>  |
| Urinary bladder cancer                   | 18794855 | rs710521   | 1x10 <sup>-7</sup>  |

**Table S6:** RMSD, Rg, SASA values from MD simulations.

| Attributes | Wildtype R319 |      |          | Mutant319 |      |        | WildtypeG349 |       |        | MutantG349 |      |        | Wild type |      |      | Mutant |        |        |
|------------|---------------|------|----------|-----------|------|--------|--------------|-------|--------|------------|------|--------|-----------|------|------|--------|--------|--------|
|            | RMSD          | Rg   | SASA     | RMSD      | Rg   | SASA   | RMSD         | Rg    | SASA   | RMSD       | Rg   | SASA   | RMSD      | Rg   | SASA | RMSD   | Rg     | SASA   |
| Mean       | 12.0          | 19.2 | 5295.7   | 13.093    | 24.6 | 5450.3 | 12.0         | 20.9  | 5425.6 | 11.0       | 20.9 | 5354.8 | 8.4       | 9.7  | 19.4 | 17.6   | 5109.9 | 5030.1 |
| Min        | 0.52          | 13.7 | 4795.1   | 0.54      | 18.5 | 4880.1 | 0.68         | 15.76 | 4711.9 | 0.60       | 16.5 | 4569.5 | 0.4       | 0.40 | 15.8 | 13.5   | 4706.9 | 4454.0 |
| Max        | 18.8          | 28.4 | 5853.755 | 19.1      | 28.7 | 6060.6 | 17.6         | 27.63 | 6267.8 | 18.2       | 29.1 | 6215.6 | 24.0      | 20.3 | 27.5 | 24.9   | 6120.1 | 5717.6 |
